# Supplementary material for: Socioeconomic inequalities in health care utilization in Paraguay: Description of trends from 1999 to 2018
Source: PubMed Central journal article supplement — J Health Serv Res Policy. 2022 Jun 22;27(3):180–9. doi: 10.1177/13558196221079160 (PMC9277338; doi:10.1177/13558196221079160), 2022-06-22

## SUPPLEMENT 1

**Table S1.** Frequency of people who reported any health problem in last 90 days, adults  $\geq 18$  years in EPH 1999 to 2018

| EPH cycle                        | Full adult sample | Sample restricted to those who reported a health problem |                             |                                              |
|----------------------------------|-------------------|----------------------------------------------------------|-----------------------------|----------------------------------------------|
|                                  |                   | n                                                        | % <sup>1</sup> (unweighted) | Weighted % <sup>1</sup> (CI <sub>95%</sub> ) |
| 1999                             | 12,805            | 4,531                                                    | 35.4                        | 34.7 (33.1; 36.3)                            |
| 2000-01                          | 20,481            | 7,730                                                    | 37.7                        | 35.2 (33.4; 37.2)                            |
| 2003                             | 24,012            | 7,188                                                    | 29.9                        | 29.8 (28.7; 30.9)                            |
| 2004                             | 19,516            | 6,367                                                    | 32.6                        | 32.7 (31.5; 33.9)                            |
| 2005                             | 11,174            | 3,845                                                    | 34.4                        | 34.9 (33.3; 36.5)                            |
| 2006                             | 13,115            | 2,866                                                    | 21.8                        | 20.6 (19.2; 22.1)                            |
| 2007                             | 12,135            | 2,527                                                    | 20.8                        | 19.2 (18.1; 20.4)                            |
| 2008                             | 11,369            | 3,228                                                    | 28.4                        | 26.9 (25.7; 28.2)                            |
| 2009                             | 11,097            | 3,484                                                    | 31.4                        | 32.4 (30.9; 34.3)                            |
| 2010                             | 12,427            | 4,354                                                    | 35.0                        | 36.8 (35.1; 38.6)                            |
| 2012                             | 13,262            | 5,008                                                    | 37.8                        | 36.3 (34.8; 37.8)                            |
| 2013                             | 13,601            | 4,448                                                    | 32.7                        | 32.4 (30.7; 34.2)                            |
| 2014                             | 13,163            | 3,131                                                    | 23.8                        | 22.8 (21.6; 24.0)                            |
| 2015                             | 20,315            | 6,003                                                    | 29.5                        | 28.6 (27.3; 29.9)                            |
| 2016                             | 24,580            | 9,096                                                    | 37.0                        | 34.6 (33.5; 35.8)                            |
| 2017                             | 23,101            | 9,936                                                    | 43.0                        | 40.0 (38.8; 41.2)                            |
| 2018                             | 12,255            | 4,765                                                    | 38.9                        | 37.0 (35.7; 38.4)                            |
| Average percentage across cycles |                   |                                                          |                             | 31.4                                         |

<sup>1</sup>As percentage of full EPH adult sample

Table S2. Distribution of healthcare utilization<sup>1</sup> by income groups, EPH 1999 to 2018

| Cycle      | Sample size | PIR<1 |                           | ≥1 PIR <2 |                           | ≥2 PIR <3 |                           | ≥3 PIR <5 |                           | PIR≥5 |                           |
|------------|-------------|-------|---------------------------|-----------|---------------------------|-----------|---------------------------|-----------|---------------------------|-------|---------------------------|
|            |             | n     | %<br>(CI <sub>95%</sub> ) | n         | %<br>(CI <sub>95%</sub> ) | n         | %<br>(CI <sub>95%</sub> ) | n         | %<br>(CI <sub>95%</sub> ) | n     | %<br>(CI <sub>95%</sub> ) |
| EPH 1999   | 4,492       | 615   | 40.9<br>(37.3,44.7)       | 646       | 46.7<br>(42.7,50.7)       | 354       | 53.4<br>(48.3,58.5)       | 331       | 63.0<br>(56.5,69.1)       | 297   | 69.8<br>(63.4,75.6)       |
| EIH 2000-1 | 7,665       | 970   | 41.1<br>(36.9,45.3)       | 1,150     | 49.0<br>(44.9,53.2)       | 679       | 57.6<br>(52.6,62.3)       | 584       | 63.2<br>(57.5,68.6)       | 483   | 70.5<br>(64.6,75.7)       |
| EPH 2003   | 7,142       | 1,210 | 43.5<br>(40.9,46.3)       | 1,207     | 54.1<br>(51.1,57.0)       | 538       | 59.3<br>(54.7,63.7)       | 438       | 60.3<br>(55.1,65.3)       | 342   | 72.3<br>(66.9,77.1)       |
| EPH 2004   | 6,344       | 1,043 | 44.4<br>(41.5,47.4)       | 1,028     | 50.7<br>(47.4,53.8)       | 491       | 52.6<br>(47.6,57.6)       | 434       | 61.0<br>(55.0,66.6)       | 240   | 65.6<br>(59.0,71.7)       |
| EPH 2005   | 3,795       | 602   | 49.1<br>(44.6,53.6)       | 677       | 56.9<br>(53.4,60.4)       | 335       | 62.3<br>(56.5,67.7)       | 280       | 68.7<br>(63.2,73.7)       | 217   | 78.2<br>(71.2,83.9)       |
| EPH 2006   | 2,847       | 611   | 52.9<br>(48.1,57.8)       | 567       | 61.6<br>(56.6,66.4)       | 292       | 71.4<br>(64.7,77.3)       | 166       | 69.0<br>(57.9,78.2)       | 112   | 77.0<br>(65.5,85.6)       |
| EPH 2007   | 2,522       | 593   | 64.1<br>(59.5,68.4)       | 642       | 76.1<br>(72.2,79.7)       | 237       | 80.0<br>(73.8,85.1)       | 180       | 85.0<br>(78.2,90.0)       | 131   | 85.4<br>(76.1,91.5)       |
| EPH 2008   | 3,211       | 645   | 60.5<br>(56.0,64.8)       | 731       | 69.2<br>(65.1,73.0)       | 358       | 78.8<br>(73.1,83.6)       | 310       | 80.8<br>(75.5,85.2)       | 190   | 78.3<br>(71.5,83.9)       |
| EPH 2009   | 3,470       | 712   | 58.4<br>(54.2,62.5)       | 808       | 69.7<br>(65.6,73.4)       | 378       | 75.2<br>(69.4,80.2)       | 328       | 79.7<br>(74.5,84.0)       | 186   | 75.1<br>(66.9,81.8)       |
| EPH 2010   | 4,326       | 911   | 66.3<br>(62.4,69.9)       | 948       | 67.9<br>(64.4,71.1)       | 545       | 73.2<br>(68.8,77.2)       | 387       | 73.6<br>(67.0,79.2)       | 199   | 72.3<br>(64.1,79.2)       |
| EPH 2012   | 4,991       | 791   | 61.0<br>(57.0,64.9)       | 1,087     | 67.8<br>(64.3,71.0)       | 579       | 65.0<br>(60.2,69.5)       | 459       | 67.7<br>(62.4,72.5)       | 365   | 80.8<br>(76.1,84.7)       |
| EPH 2013   | 4,438       | 643   | 66.4<br>(62.1,70.4)       | 1,079     | 69.4<br>(65.6,72.9)       | 576       | 75.0<br>(67.2,81.5)       | 485       | 74.6<br>(69.0,79.4)       | 356   | 80.5<br>(73.7,85.9)       |
| EPH 2014   | 3,122       | 490   | 77.4<br>(72.9,81.4)       | 811       | 77.6<br>(73.9,80.9)       | 493       | 78.7<br>(73.9,82.9)       | 349       | 81.7<br>(76.2,86.2)       | 258   | 81.3<br>(76.0,85.7)       |
| EPH 2015   | 5,993       | 977   | 76.9<br>(73.2,80.3)       | 1,498     | 77.0<br>(73.2,80.3)       | 943       | 82.3<br>(78.3,85.8)       | 800       | 78.7<br>(72.4,83.9)       | 548   | 79.8<br>(74.1,84.5)       |
| EPH 2016   | 9,078       | 1,873 | 68.8<br>(66.1,71.4)       | 2,180     | 69.2<br>(66.4,71.9)       | 1,131     | 73.6<br>(69.9,77.0)       | 760       | 72.1<br>(67.9,76.0)       | 523   | 72.9<br>(66.7,78.2)       |
| EPH 2017   | 9,915       | 1,640 | 62.0<br>[59.1,64.7]       | 2,517     | 67.3<br>[64.9,69.6]       | 1,137     | 66.1<br>[62.7,69.3]       | 849       | 62.2<br>[57.2,66.9]       | 498   | 73.5<br>[68.2,78.1]       |
| EPH 2018   | 4,752       | 782   | 65.8<br>[61.7,69.8]       | 1,144     | 64.8<br>[61.8,67.8]       | 604       | 65.9<br>[61.4,70.1]       | 410       | 69.6<br>[64.5,74.3]       | 296   | 71.8<br>[65.6,77.2]       |

<sup>1</sup> Consultation or hospitalization in those who reported a health problem in last 90 days.

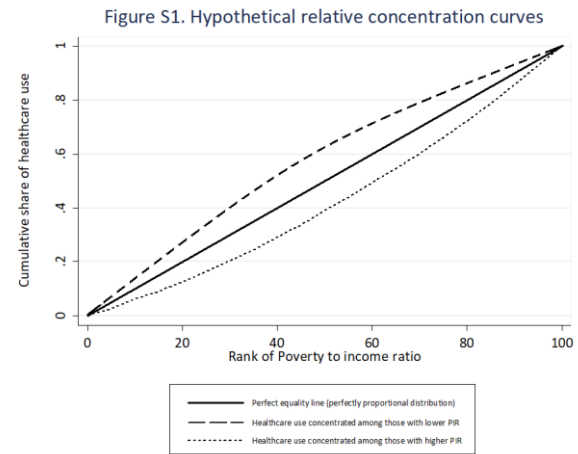

Figure S2. Trends of income-related inequality in health care use, by area  
EPH 1999 to 2018

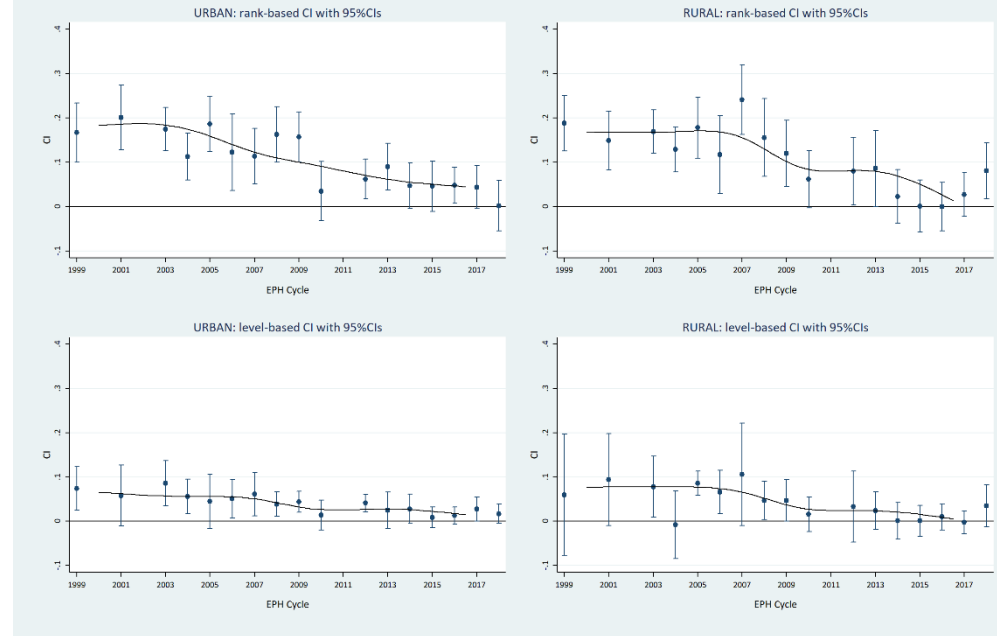

Figure S3. Trends of income-related inequality in health care use, by sex  
EPH 1999 to 2018

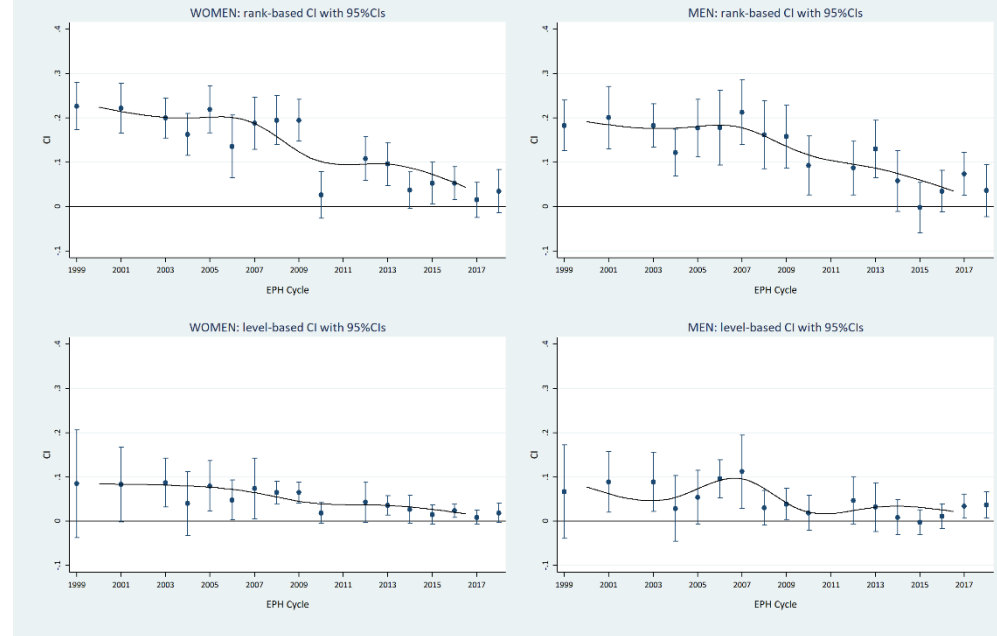

Figure S4. Trends of income-related inequality in health care use, ages 65+  
EPH 1999 to 2018

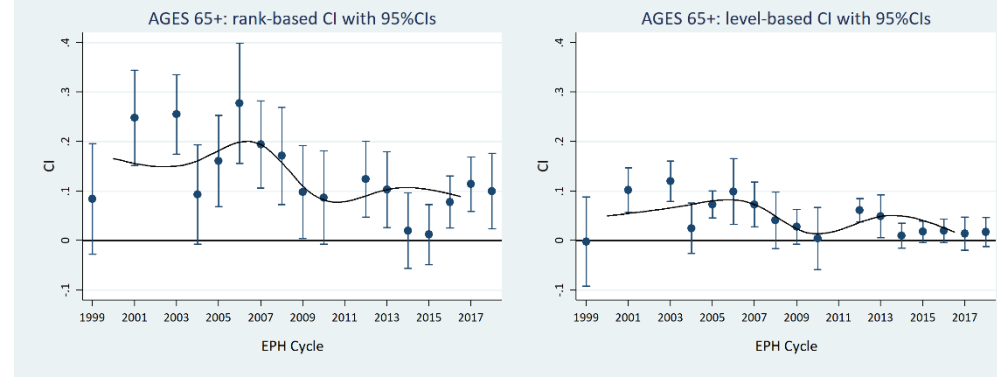

Figure S5. Trends of income-related inequality in health care use - alternative CIs  
EPH 1999 to 2018

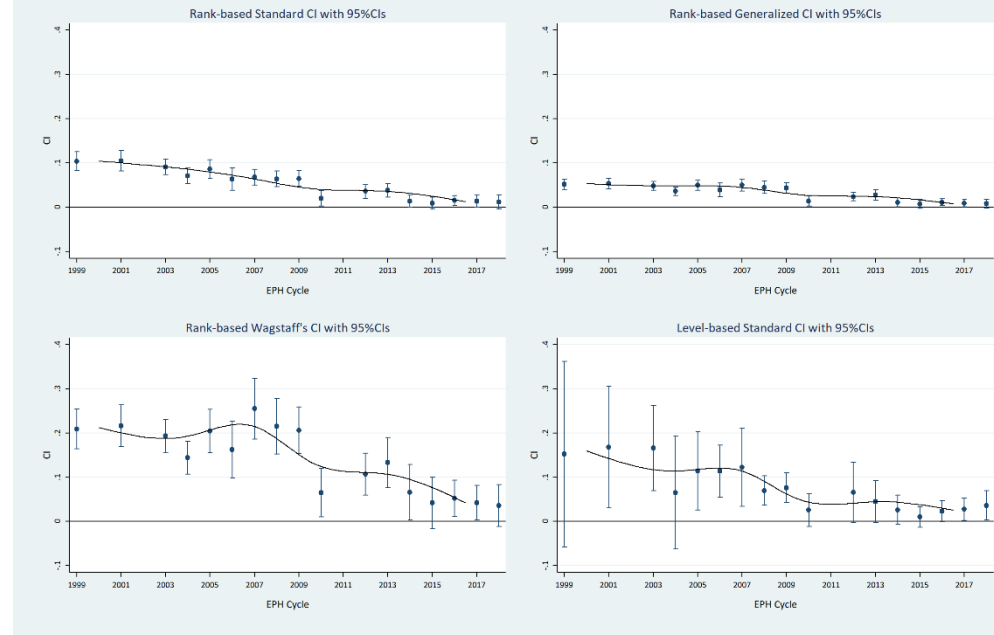

Supplement: sj-pdf-1-hsr-10.1177_13558196221079160.pdf [file sj-pdf-1-hsr-10.1177_13558196221079160.pdf]
